# Supplementary material for: Cinnamic acid activates PPARα to stimulate Lysosomal biogenesis and lower Amyloid plaque pathology in an Alzheimer’s disease mouse model
Source: PubMed Central journal article supplement — Neurobiol Dis. Author manuscript; Available in PMC 2020 Apr 1. (PMC6382282; doi:10.1016/j.nbd.2018.12.007), 2018-12-19
Supplement: NIHMS1517565-supplement-1.pdf [file NIHMS1517565-supplement-1.pdf]

## SUPPORTING INFORMATION

**Table S1. List of primary antibodies**

| Target and Antibody                            | Source     | Catalog No. | Application / Dilution                      |
|------------------------------------------------|------------|-------------|---------------------------------------------|
| LAMP2                                          | Millipore  | MABC40      | WB: 1 : 1000<br>ICC: 1 : 500                |
| GFAP                                           | DAKO       | IS524       | ICC: 1 : 1000<br>IHC: 1 : 1000              |
| TFEB                                           | Abcam      | ab2636      | WB: 1 : 500<br>ICC: 1 : 500<br>IHC: 1 : 500 |
| MAP2                                           | Millipore  | AB5622      | ICC: 1 : 750                                |
| PPAR $\alpha$                                  | Santa Cruz | sc-398394   | ICC: 1 : 500<br>ChIP: 1 : 100               |
| PPAR $\beta$                                   | Santa Cruz | sc-7197     | ChIP: 1 : 100                               |
| PPAR $\gamma$                                  | Santa Cruz | sc-7273     | ChIP: 1 : 100                               |
| CBP                                            | Santa Cruz | sc-369      | ChIP: 1 : 100                               |
| RNA Pol                                        | Millipore  | 05-623      | ChIP: 1 : 200                               |
| $\beta$ -Amyloid<br>Mouse monoclonal<br>(6E10) | BioLegend  | 803001      | WB: 1 : 1000<br>IHC: 1 : 500                |
| $\beta$ -Actin                                 | Abcam      | ab6276      | WB: 1 : 10000                               |

WB: Western blot; ICC: immunocytochemistry; IHC: immunohistochemistry; ChIP: chromatin immunoprecipitation.

## LEGENDS TO SUPPLEMENTAL FIGURES

**Figure S1. Cinnamic acid upregulates lysosomal markers in vivo in 5XFAD mice.** Six months old 5XFAD mice were treated with cinnamic acid (100 mg/kg/day) daily for one month following which (A-F) the TFEB level in the (A, B) CA1, (C, D) DG regions of the hippocampus and the (E, F) cortex was analyzed by colabeling TFEB and GFAP and quantification of the mean fluorescence intensity of TFEB. (G-H) The activity of the enzymes (G) Cathepsin-B and (H) Tripeptidyl-peptidase was monitored in untreated Tg and cinnamic acid treated mice. Data represents fold change mean  $\pm$  SEM with respect to the untreated Tg control. Statistical analysis was performed by student's unpaired t-test. \*  $p < .05$ ; \*\*  $p < .01$ ; \*\*\*  $p < .001$ .

**Figure S2. Cinnamic acid lowers amyloid-beta levels in 5XFAD mice.** Six months old 5XFAD mice (n=8 / group) were treated via oral gavage with cinnamic acid (100 mg/kg/day) or vehicle (.5% methylcellulose) daily for one month following which they were sacrificed and the

cerebral amyloid-beta levels were analyzed by (A-B) Diaminobenzidine staining using A $\beta$  6E10 antibody and quantification of amyloid plaques per mm<sup>2</sup> in the hippocampus. All data represents mean  $\pm$  SEM. One way ANOVA followed by Tukey's multiple comparison test was used for statistical analysis; \* p<.05; \*\* p<.01; \*\*\* p<.001.

**Figure S3. Oral administration of cinnamic acid reduces amyloid plaque deposition in the hippocampus of 5XFAD mice.** Six months old 5XFAD mice (n=8 / group) were treated orally with cinnamic acid (100 mg/kg/day) or vehicle (.5% methylcellulose) daily for one month followed by monitoring of cerebral amyloid plaque deposition by colabeling free floating hippocampal sections with thioflavin-S and A $\beta$  6E10 antibody. Thio-S and A $\beta$  positive plaques in (A) CA1 and (B) CA3 are shown.

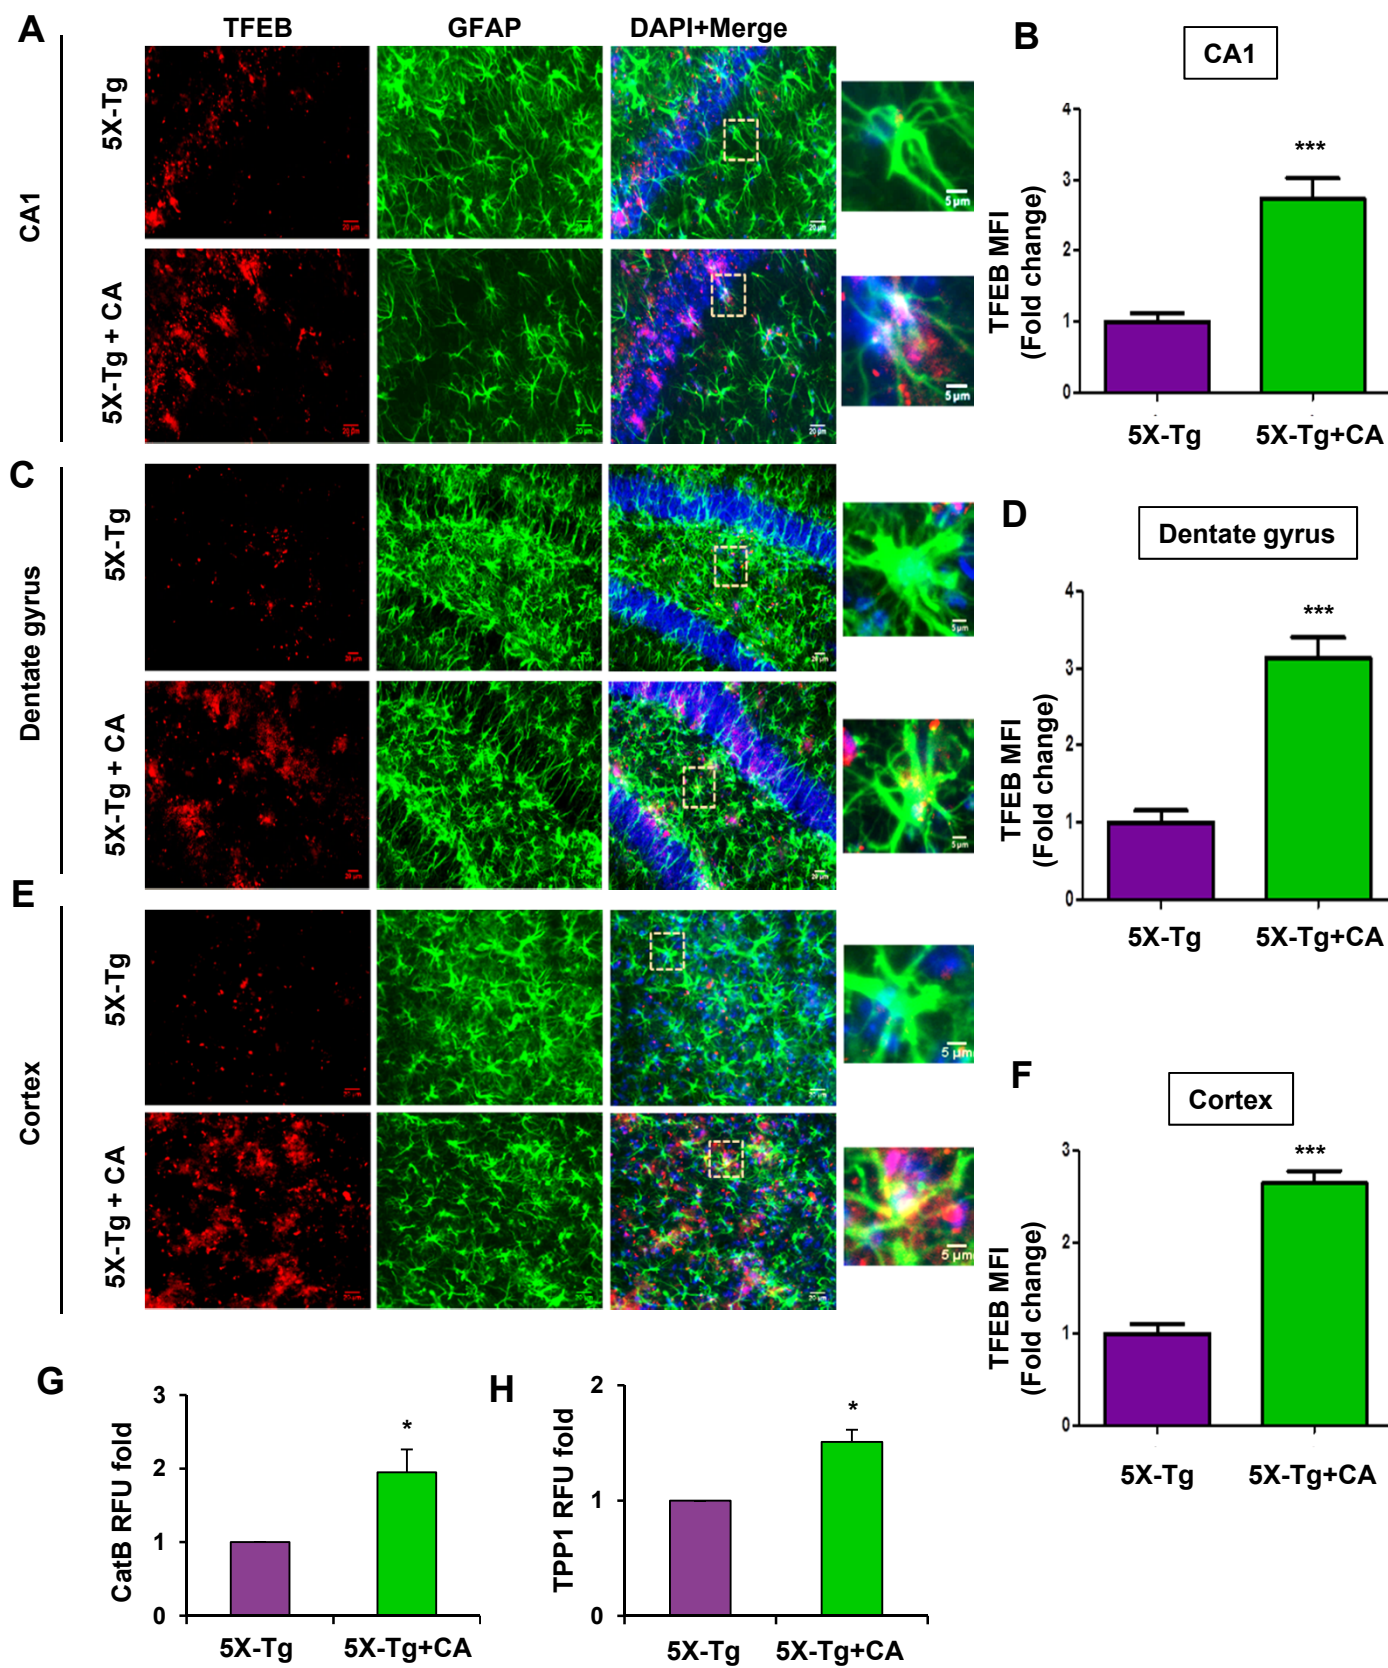

Figure S1

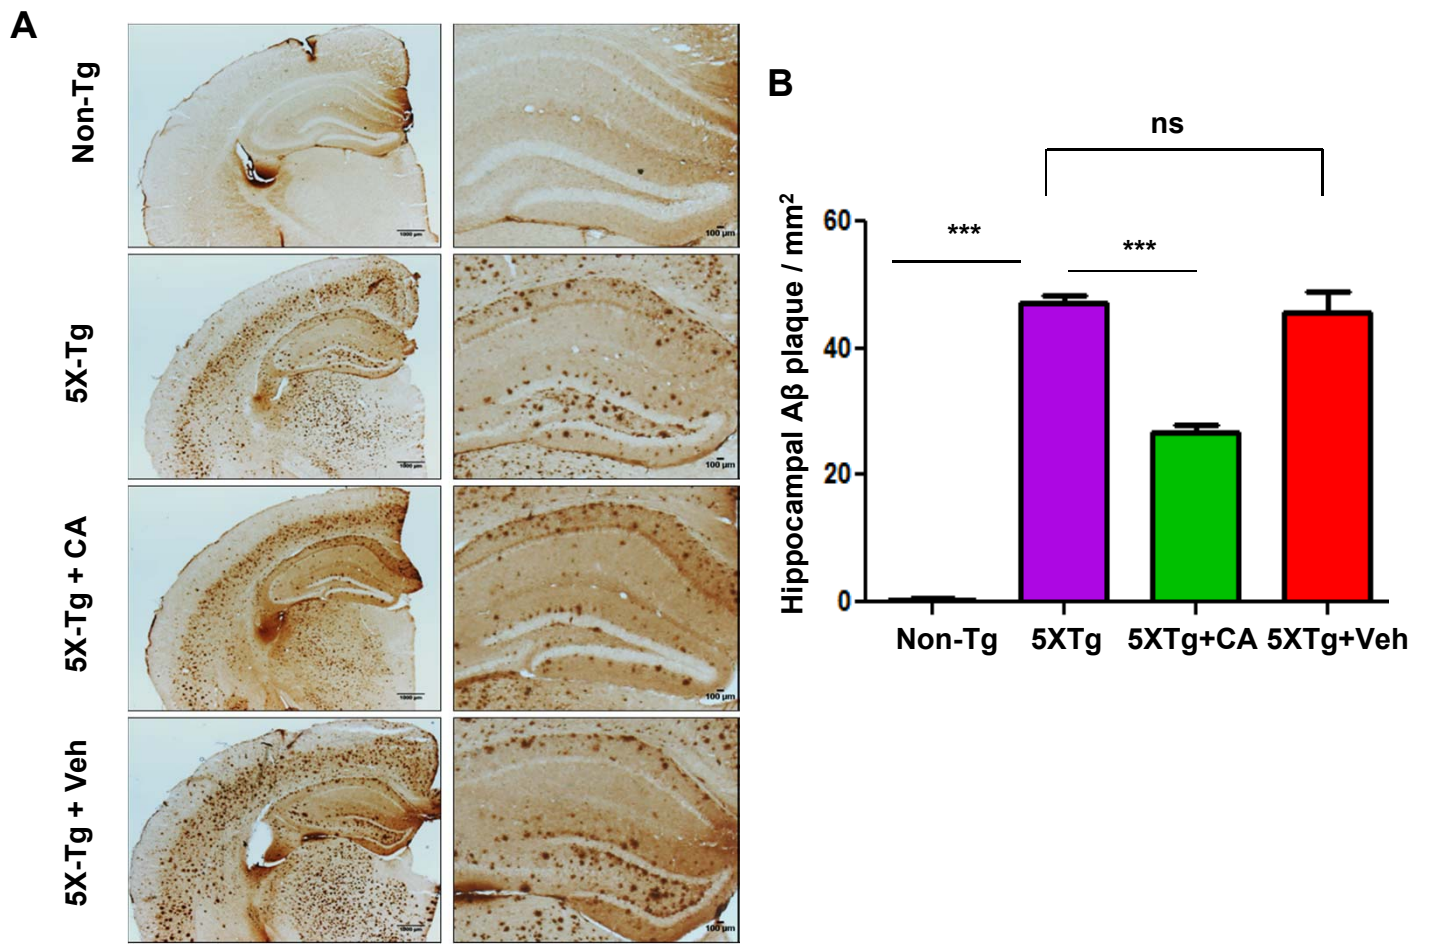

Figure S2

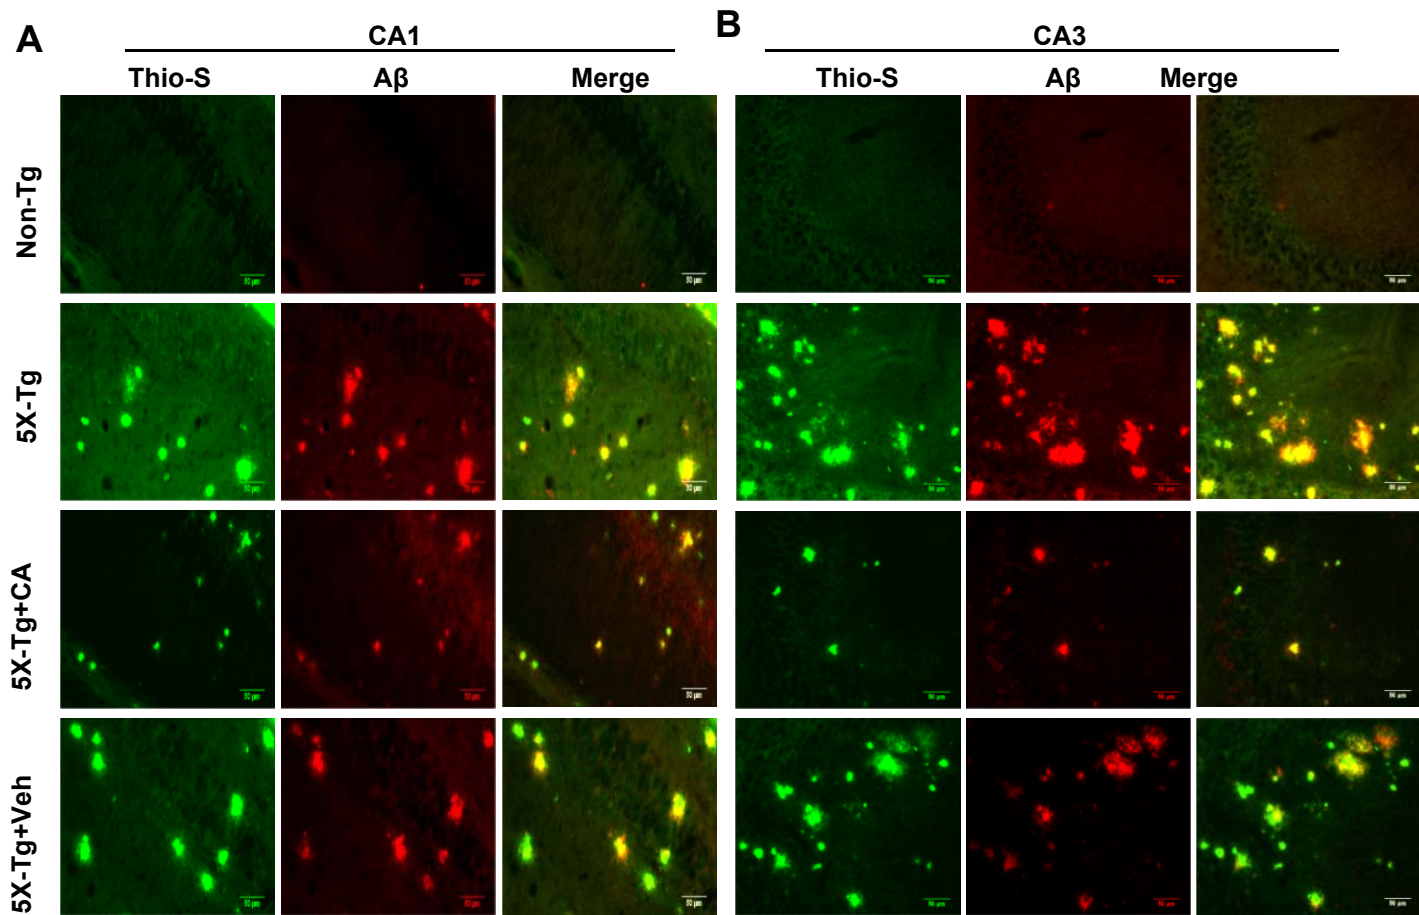

Figure S3
